# Supplementary material
Source: bioRxiv or medRxiv preprint supplement (https://www.biorxiv.org/highwire/filestream/36446/field_highwire_adjunct_files/14/124321-22.pdf)
Supplement: Supplementary file [file 124321-22.pdf]

# Transcript Junction

Exon

DER

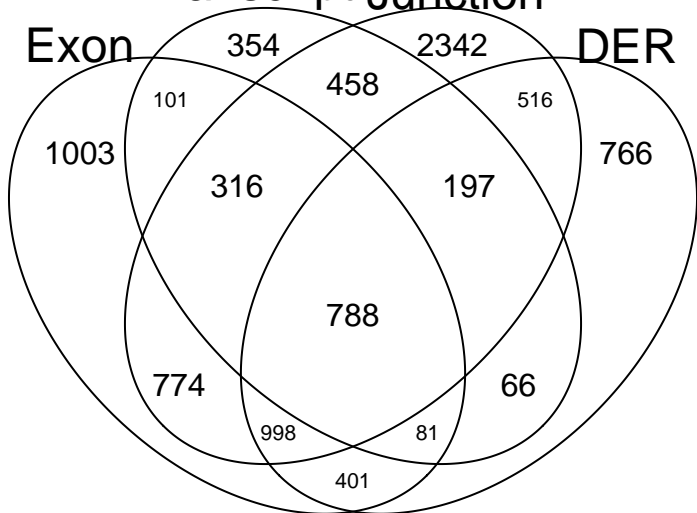

0
